# Supplementary material for: Production of bio-ethene and propene: alternatives for bulk chemicals and polymers
Source: Royal Society of Chemistry journal article supplement (doi:10.1039/c3gc41097h), 2013-01-01
Supplement: c3gc41097h.xlsx [file c3gc41097h.xlsx]

## Sheet: Single coil calculation
	Naphtha	HDO
Simulation input and results
Mass flow (kg/hr)	1540	1540
Proces Heat input (kJ/s)	816.7	724.9
Ethylene (wt%)	29.594	33.306
HVC (wt%)	68.0162	75.4988
								INPUT
Calculations								Green ethylene price increase (-)	1	Number of furnaces	1
Total Heat input (kJ/s)	1944.52	1725.95						Green propylen price increase (-)	1	Size hydrotreater (BPD)	4000
Mass flow (t/s) Single coil	0.000427778	0.000427778						Fat price (cts/lb)	38	Density naphtha (kg/dm³)	0.75
Mass flow (kt/yr)	12.32	12.32						Hydrotreater return time (yr)	10	Gallons per barrel	42
Total heat input (GJ/t)	4.54564	4.03469
Total heat input (GJ/t HVC)	6.68317	5.34405						Conversion factors
Total heat input (GJ/t ethylene)	15.36	12.114						Gallon to kg (kg/Gallon)	2.8425
LHV Methane (MJ/kg)	50.009	50.009
LHV Methane (GJ/kg)	0.050009	0.050009
Methane consumption (kg/t HVC)	133.639	106.862						Hydrotreater
Methane consumption (kg/t ethylene)	307.145	242.237						Size (BPD)	Running costs ($/gallon)	Investment cost ($/gallon)	Investment cost ($)	Running cost HDO (cts/gallon)	Production (t/d)	Production (kt/yr)	Production (Gallons/hr)	Production (t/s)
MM methane (kg/kmole)	16.04	16.04						2000	0.53	0.21	4.01134e+06	33	238.77	87.1511	3500	0.00276354
Methane consumption (kmole/t HVC)	8.33163	6.66221						4000	0.47	0.15	5.73048e+06	30	477.54	174.302	7000	0.00552708
Methane consumption (kmole/t ethylene)	19.1487	15.102						6500	0.42	0.13	8.07043e+06	27.5	776.003	283.241	11375	0.00898151
CO2 Production (kmole/t HVC)	8.33163	6.66221
CO2 Production (kmole/t ethylene)	19.1487	15.102
MM CO2 (kg/kmole)	44.01	44.01
CO2 Production (kg/t HVC)	366.675	293.204
CO2 Production (kg/t ethylene)	842.733	664.641
Relative tov naphtha HVC(%)	100	79.9628
Relative tov naphtha ethylene (%)	100	78.8673
Flows and Sizing
Number of coils (-)	8	8
Number of furnaces on HDO (-)	1	1
Total flow rate (t/s)	0.00342222	0.00342222
Size Hydrotreater (BPD)	4000	4000
Costs
Running costs
Feedstock cost base case($/t feed)	860	976.668
Operating costs hydrotreater ($/t feed)	0	105.541
Fuel Gas ($/t fuel gas)	262	262
Fuel gas ($/t feed)	23.8149	21.138
Other utilities ($/t feed)	5.74124	6.46136
Investment costs
Hydrotreater ($)	0	5.73048e+06
Total costs
Total costs ($/yr)	8.76746e+07	1.09956e+08
Ethylene production (ton ethylene/yr)	31406.3	35101.9
HVC production (ton HVC/yr)	67036.8	74411.6
Total cost per ethylene unit ($/ton ethylene)	2791.62	3132.47
Total cost per HVC unit($/ton HVC)	1307.86	1477.67
Relative cost per ethylene (-)	1	1.1221
Relative cost per HVC unit (-)	1	1.12984

## Sheet: Yields simulation
Number	Name	Naphtha	Condensate	HDO	HDO + condensate
1	H2	1.526	1.053	0.573	0.858
2	CH4	18.169	14.344	8.914	12.171
3	C2H2	0.334	0.096	0.114	0.12
4	C2H4	29.594	27.898	33.306	31.841
5	C2H6	2.839	2.214	2.886	2.518
6	C3H4(MA)	0.858	0.726	0.248	0.628
7	C3H4(PD)	0.891	0.761	0.29	0.67
8	C3H6	13.582	13.656	21.041	16.796
9	C3H8	0.211	0.224	0.542	0.369
10	1;3-C4H6	3.768	6.019	7.734	6.926
11	1C4H8	0.455	0.608	4.001	1.156
12	2C4H8	0.212	0.25	0.241	0.279
13	iC4H8	1.539	1.27	0.292	1.041
14	iC4H10	0.005	0.005	0.015	0.011
15	nC4H10	0.01	0.026	0.13	0.082
17	CO	0.138	0.104	0.036	0.073
18	CO2	0.011	0.008	0.002	0.005
60	Benzene	5.974	6.978	2.583	5.355
61	Toluene	1.849	4.243	0.821	2.775
62	Xylene	0.493	2.583	0.85	1.685
63	etBenz	0.076	0.086	0.022	0.069
64	Styrene	2.091	2.36	0.618	1.616
71	Naphth	4.363	2.076	1.143	1.871
72	mNaphth	1.808	0.935	0.147	0.587
686	anthrace	0.728	0.239	0.064	0.174
687	phenantr	0.485	0.159	0.042	0.116
690	pyrene	1.187	0.326	0.018	0.152
	HVC	68.0162	71.2852	75.4988	74.7224
	With recycles
	ethylene (wt%)	31.8652	29.6692	35.6148	33.8554
	Propylene (wt%)	13.793	13.88	21.583	17.165
	Fuel Gas (wt%)	18.169	14.344	8.914	12.171
	Hydrogen (wt%)	1.526	1.053	0.573	0.858
	butadiene (wt%)	3.768	6.019	7.734	6.926
	benzene (wt%)	5.974	6.978	2.583	5.355
	toluene (wt%)	1.849	4.243	0.821	2.775
	xylene (wt%)	0.493	2.583	0.85	1.685

## Sheet: Sensitivity Analysis
Feedstock price Grease	Relative cost increase (HVC based)		Feedstock price naphtha	Relative cost increase (HVC based)
30	0.921604		750	1.30494
31	0.961372		760	1.28842
32	0.987402		770	1.2723
33	1.01343		780	1.25659
34	1.03946		790	1.24125
35	1.06549		800	1.22629
36	1.09152		810	1.21168
37	1.11755		820	1.19742
38	1.14358		830	1.18349
39	1.16961		840	1.16988
40	1.19564		850	1.15658
41	1.22167		860	1.14358
42	1.24769		870	1.13086
43	1.27372		880	1.11843
44	1.29975		890	1.10627
45	1.32578		900	1.09437
46	1.35181		910	1.08272
47	1.37784		920	1.07132
48	1.40387		930	1.06015
49	1.4299		940	1.04922
50	1.45593		950	1.03851
			960	1.02801
			970	1.01773
			980	1.00765
			990	0.997764
			1000	0.988073
